# Supplementary material for: Effects of Dating Matters® on Sexual Violence and Sexual Harassment Outcomes among Middle School Youth: a Cluster-Randomized Controlled Trial
Source: PubMed Central journal article supplement (PMC7840649; doi:10.1007/s11121-020-01152-0), 2020-08-26

Supplemental Table 1. Estimates of Relative Risk Reduction and Associated Statistical Tests for Sexual Violence and Sexual Harassment Outcomes

|                                |          | Sexual Harassment |       |          |      |               |       |          |       | Sexual Violence |       |          |      |               |      |          |      |  |
|--------------------------------|----------|-------------------|-------|----------|------|---------------|-------|----------|-------|-----------------|-------|----------|------|---------------|------|----------|------|--|
|                                |          | Perpetration      |       |          |      | Victimization |       |          |       | Perpetration    |       |          |      | Victimization |      |          |      |  |
|                                |          | Cohort 3          |       | Cohort 4 |      | Cohort 3      |       | Cohort 4 |       | Cohort 3        |       | Cohort 4 |      | Cohort 3      |      | Cohort 4 |      |  |
|                                |          | F                 | M     | F        | M    | F             | M     | F        | M     | F               | M     | F        | M    | F             | M    | F        | M    |  |
| 6th Grade,<br>Spring           | Estimate | 0.00              | 0.00  | 0.00     | 0.00 | 18.47         | 0.00  | 0.00     | 10.59 | 0.00            | 0.00  | 0.00     | 0.00 | 0.00          | 0.00 | 0.00     | 0.00 |  |
|                                | SE       |                   |       |          |      | 3.38          |       |          | 1.97  |                 |       |          |      |               |      |          |      |  |
|                                | Wald     |                   |       |          |      | 5.46          |       |          | 5.39  |                 |       |          |      |               |      |          |      |  |
|                                | p-value  |                   |       |          |      | 0.000         |       |          | 0.000 |                 |       |          |      |               |      |          |      |  |
|                                | 95% CI   | Lower             |       |          |      |               | 11.84 |          |       | 6.74            |       |          |      |               |      |          |      |  |
|                                |          | Upper             |       |          |      |               | 25.11 |          |       | 14.44           |       |          |      |               |      |          |      |  |
| 7th Grade,<br>Fall             | Estimate | 0.00              | 0.00  | 0.00     | 0.00 | 17.14         | 0.00  | 0.00     | 0.00  | 0.00            | 45.03 | 0.00     | 0.00 | 0.00          | 0.00 | 0.00     | 0.00 |  |
|                                | SE       |                   |       |          |      | 2.44          |       |          |       |                 | 7.80  |          |      |               |      |          |      |  |
|                                | Wald     |                   |       |          |      | 7.02          |       |          |       |                 | 5.77  |          |      |               |      |          |      |  |
|                                | p-value  |                   |       |          |      | 0.000         |       |          |       |                 | 0.000 |          |      |               |      |          |      |  |
|                                | 95% CI   | Lower             |       |          |      |               | 12.36 |          |       |                 |       | 29.74    |      |               |      |          |      |  |
|                                |          | Upper             |       |          |      |               | 21.92 |          |       |                 |       | 60.32    |      |               |      |          |      |  |
| 7th Grade,<br>Spring           | Estimate | 0.00              | 0.00  | 0.00     | 0.00 | 18.47         | 8.82  | 20.82    | 0.00  | 0.00            | 0.00  | 0.00     | 0.00 | 0.00          | 0.00 | 0.00     | 0.00 |  |
|                                | SE       |                   |       |          |      | 3.38          | 3.45  | 3.25     |       |                 |       |          |      |               |      |          |      |  |
|                                | Wald     |                   |       |          |      | 5.46          | 2.56  | 6.40     |       |                 |       |          |      |               |      |          |      |  |
|                                | p-value  |                   |       |          |      | 0.000         | 0.011 | 0.000    |       |                 |       |          |      |               |      |          |      |  |
|                                | 95% CI   | Lower             |       |          |      |               | 11.84 | 2.05     | 14.45 |                 |       |          |      |               |      |          |      |  |
|                                |          | Upper             |       |          |      |               | 25.11 | 15.59    | 27.19 |                 |       |          |      |               |      |          |      |  |
| 8 <sup>th</sup> Grade,<br>Fall | Estimate | 19.05             | 19.05 | 0.00     | 0.00 | 10.59         | 0.00  | 0.00     | 0.00  | 0.00            | 30.32 | 0.00     | 0.00 | 0.00          | 0.00 | 0.00     | 0.00 |  |
|                                | SE       | 3.20              | 3.20  |          |      | 1.97          |       |          |       |                 | 7.89  |          |      |               |      |          |      |  |
|                                | Wald     | 5.95              | 5.95  |          |      | 5.39          |       |          |       |                 | 3.84  |          |      |               |      |          |      |  |
|                                | p-value  | 0.000             | 0.000 |          |      | 0.000         |       |          |       |                 | 0.000 |          |      |               |      |          |      |  |
|                                | 95% CI   | Lower             | 12.77 | 12.77    |      |               | 6.74  |          |       |                 |       | 14.86    |      |               |      |          |      |  |
|                                |          | Upper             | 25.33 | 25.33    |      |               | 14.44 |          |       |                 |       | 45.78    |      |               |      |          |      |  |
|                                | Estimate | 19.05             | 19.05 | 0.00     | 0.00 | 24.45         | 10.59 | 10.59    | 10.59 | 30.32           | 21.06 | 0.00     | 0.00 | 26.16         | 0.00 | 26.16    | 0.00 |  |

|                                  |         |       |       |       |       |       |       |       |       |       |       |
|----------------------------------|---------|-------|-------|-------|-------|-------|-------|-------|-------|-------|-------|
|                                  | SE      | 3.20  | 3.20  | 3.36  | 1.97  | 1.97  | 1.97  | 7.89  | 11.03 | 6.67  | 6.67  |
|                                  | Wald    | 5.95  | 5.95  | 7.29  | 5.39  | 5.39  | 5.39  | 3.84  | 1.91  | 3.92  | 3.92  |
| 8 <sup>th</sup> Grade,<br>Spring | p-value | 0.000 | 0.000 | 0.000 | 0.000 | 0.000 | 0.000 | 0.000 | 0.056 | 0.000 | 0.000 |
| 95% CI                           | Lower   | 12.77 | 12.77 | 17.87 | 6.74  | 6.74  | 6.74  | 14.86 | -0.56 | 13.09 | 13.09 |
|                                  | Upper   | 25.33 | 25.33 | 31.02 | 14.44 | 14.44 | 14.44 | 45.78 | 42.68 | 39.24 | 39.24 |

Note: Relative risks of 0.00 reflect the difference between means that were constrained to be equal across DM and SC groups. Because of these constraints, no standard errors or tests of significance are available. F= Female, M = Male.

Supplemental Figure 1. CONSORT diagram for study enrollment, allocation, and data collection and analysis.

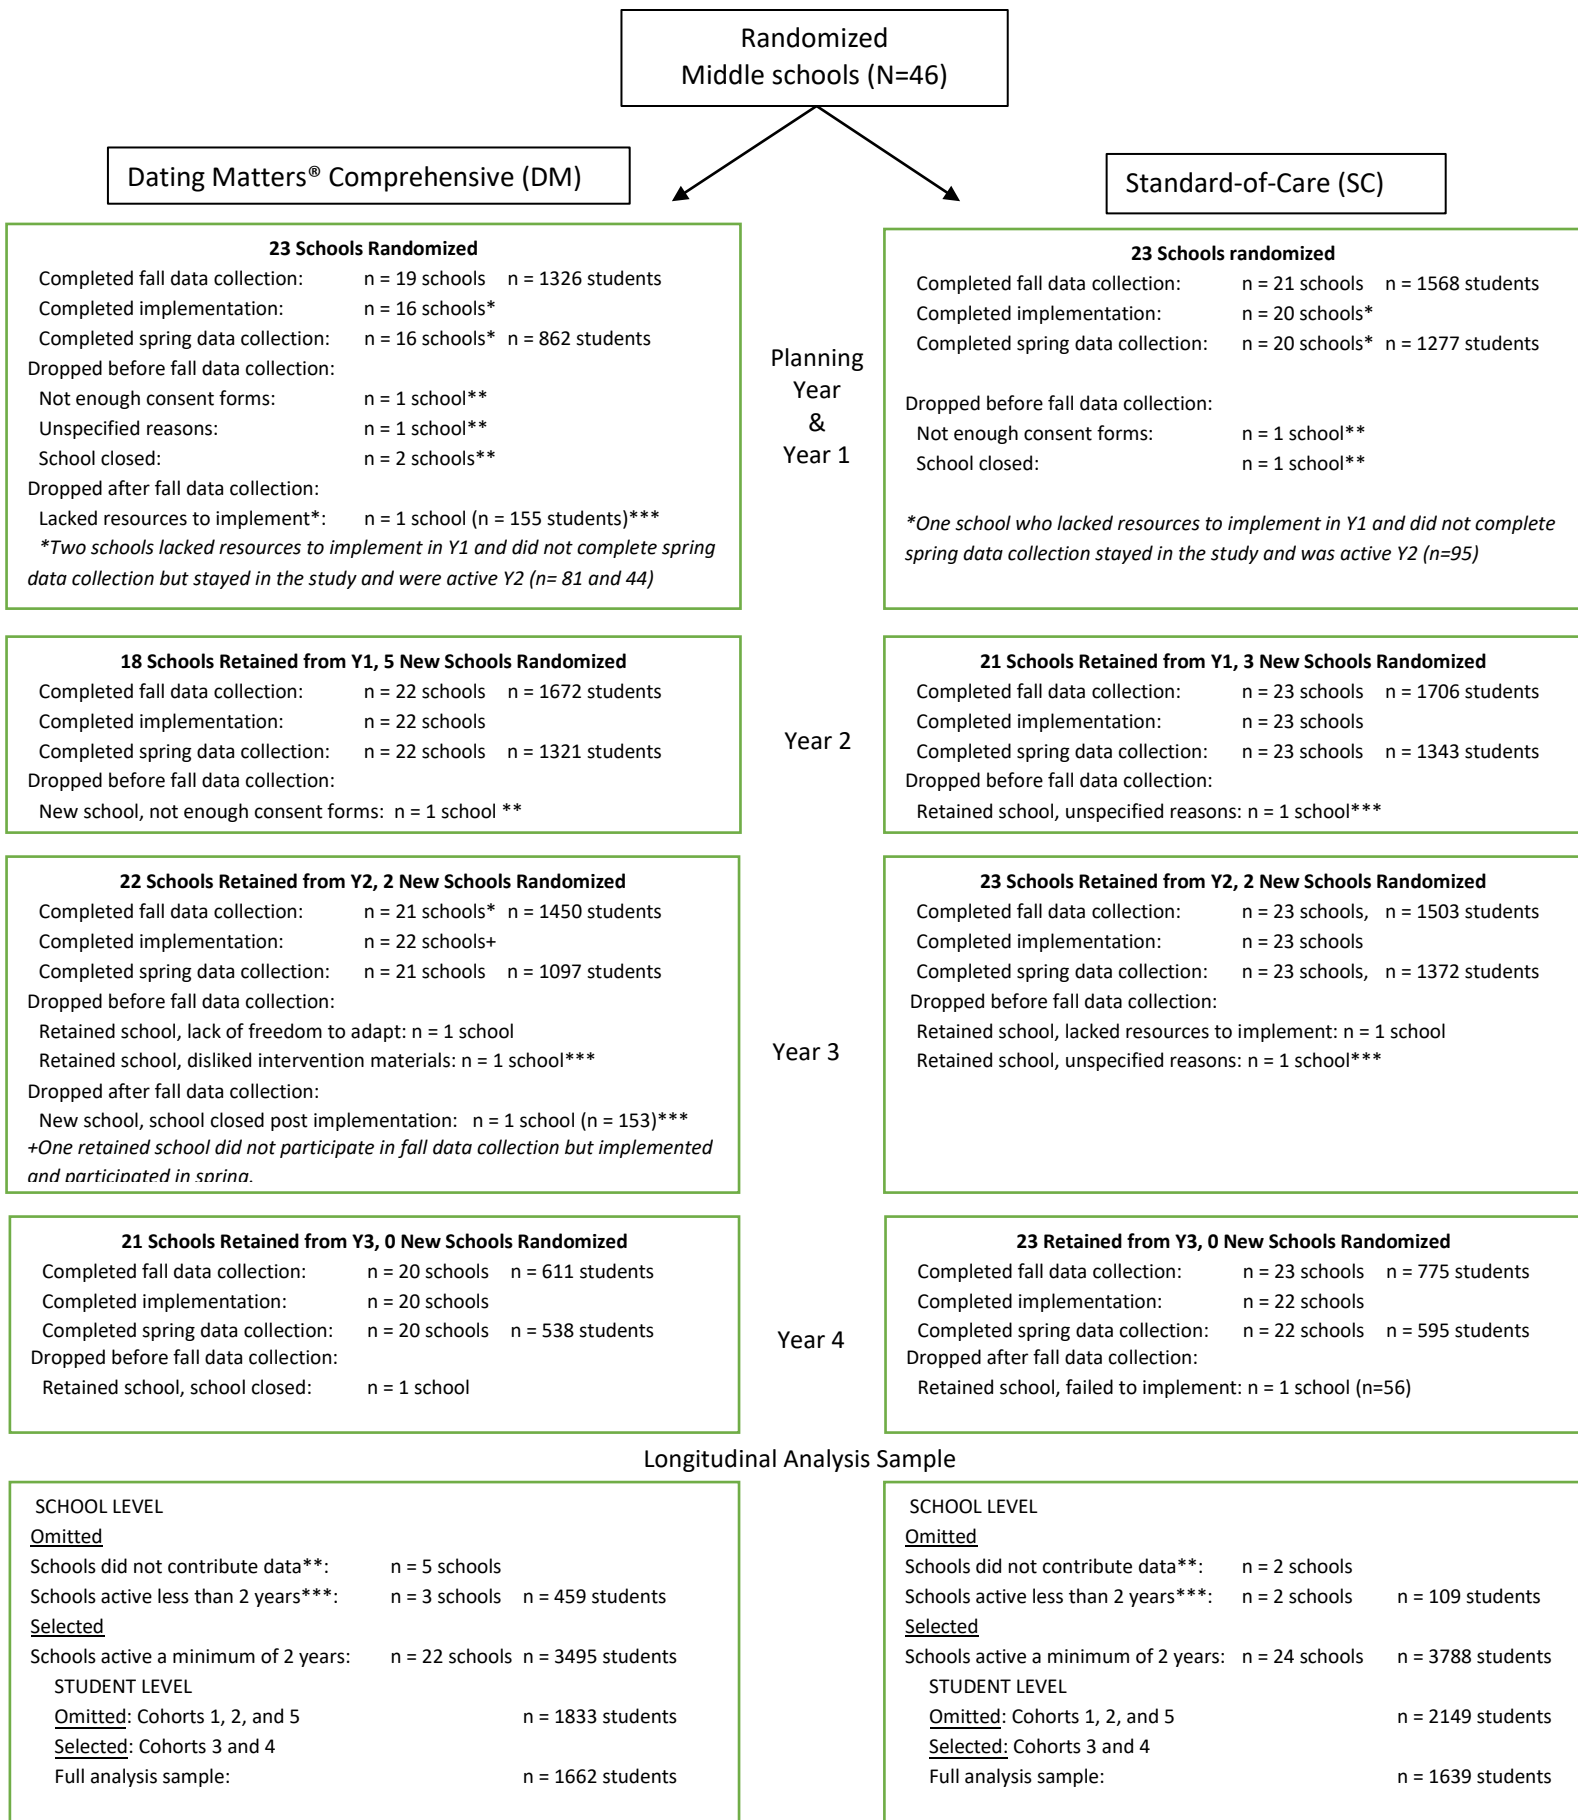

Supplement: 11121_2020_1152_MOESM1_ESM.pdf [file 11121_2020_1152_MOESM1_ESM.pdf]
